# Supplementary material for: Identification and Characterization of Novel Rat Polyomavirus 2 in a Colony of X-SCID Rats by P-PIT assay
Source: PubMed Central journal article supplement (PMC5177731; doi:10.1128/msphere.00334-16), 2016-12-21

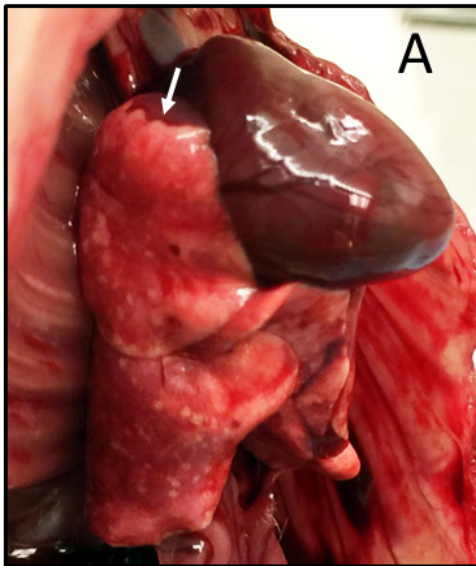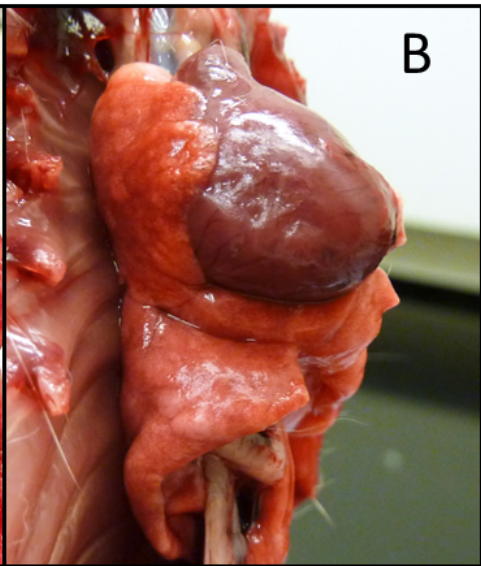

Supplement: sph006162212sf2.pdf [file sph006162212sf2.pdf]
