# Supplementary material for: Identification and Characterization of Novel Rat Polyomavirus 2 in a Colony of X-SCID Rats by P-PIT assay
Source: PubMed Central journal article supplement (PMC5177731; doi:10.1128/msphere.00334-16), 2016-12-21
Supplement: sph006162212st4.pdf [file sph006162212st4.pdf]

**Table S1. Primers used in this study**

| Primer Name  | Sequence                       | Purpose                 | Ref. |
|--------------|--------------------------------|-------------------------|------|
| VP1-1F       | CCAGACCCAACTARRAATGARAA        | VP1 Consensus PCR       | (1)  |
| VP1-1R       | AACAAGAGACACAAATNTTCCNCC       | VP1 Consensus PCR       | (1)  |
| VP1-2F       | ATGAAAATGGGGTTGGCCCNCTNTGYAARG | VP1 Consensus PCR       | (1)  |
| VP1-2R       | CCCTCATAAACCCGAACYCYTCHACYTG   | VP1 Consensus PCR       | (1)  |
| HPyV LT-F    | ARTWTCAYCCTGATAAAGG            | T antigen Consensus PCR |      |
| HPyVLT-R     | AGCANTCRWAGCAVYAGTA            | T antigen Consensus PCR |      |
| Rat PyV F2   | GCATATTACCCAGGCAGAC            | Overlapping contigs     |      |
| Rat PyV R3   | GGTAGTCCCTGCTTGCACTC           | Overlapping contigs     |      |
| Rat PyV F4   | TTCTGCTGCTGCTCAGACTG           | Overlapping contigs     |      |
| Rat PyV R5   | AATTGTCCCTCCATCAGGAC           | Overlapping contigs     |      |
| Rat PyV F6   | CCCTCAGATGGATTTAACGC           | Overlapping contigs     |      |
| Rat PyV F7   | ATGGCGACTATCATGTTTGC           | Overlapping contigs     |      |
| Rat PyV R7   | CCATTCTCATCCAACAGAGGAA         | Overlapping contigs     |      |
| Rat PyV F8   | GTAGAATAGTTGGAGGTGCTGC         | Overlapping contigs     |      |
| Rat PyV R10  | GACAATGATTTCCAAGCAGAAG         | Overlapping contigs     |      |
| Rat PyV F11  | CATCTTCTGCCGAGTTACC            | Overlapping contigs     |      |
| Rat PyV R12  | ACCTAAAGACCCTATGAGCCTC         | Overlapping contigs     |      |
| Rat PyV F13  | AGCTAACATATAGGTGGATAAGGTG      | Overlapping contigs     |      |
| Rat PyV R1   | CTTCTCCAAAAATGGATCGC           | Overlapping contigs     |      |
| Rat PyV F14  | TGAAATATCAGATCAGTGTTCTGA       | Sequencing primers      |      |
| Rat PyV R14  | ATCCTGTAACACTCCCAAACAACC       | Sequencing primers      |      |
| Beta-actin F | CACACTGTGCCCATCTATGAGG         | House-keeping gene PCR  |      |
| Beta-actin R | TCGAAGTCTAGGGCGACATAGC         | House-keeping gene PCR  |      |

**REFERENCE**

1. John R, Enderlein D, Nieper H, Müller H. Novel polyomavirus detected in the feces of a chimpanzee by nested broad-spectrum PCR. *J Virol.* 2005 Mar;79(6):3883-7.
