# Supplementary material for: Identification and Characterization of Novel Rat Polyomavirus 2 in a Colony of X-SCID Rats by P-PIT assay
Source: PubMed Central journal article supplement (PMC5177731; doi:10.1128/msphere.00334-16), 2016-12-21
Supplement: sph006162212st5.pdf [file sph006162212st5.pdf]

**Table S2. Gross findings present in Rat PyV2-infected rats**

| <b>Organ</b> | <b>Lesion</b>              | <b>Size</b> | <b>Severity</b>    | <b>Distribution</b>      |
|--------------|----------------------------|-------------|--------------------|--------------------------|
| Lung         | Red foci                   | 1-2 mm      | Mild               | Multifocal               |
|              | White foci                 | 1-2 mm      | Moderate to severe | Multifocal to coalescing |
|              | Atelectasis                | Varies      | Mild               | Cranioventral            |
| Nasal cavity | Rostral tan-brown crusting | N/A         | Mild               | Rostral, diffuse         |

N/A: Not applicable; organ not examined in this group
