# Supplementary material for: Identification and Characterization of Novel Rat Polyomavirus 2 in a Colony of X-SCID Rats by P-PIT assay
Source: PubMed Central journal article supplement (PMC5177731; doi:10.1128/msphere.00334-16), 2016-12-21
Supplement: sph006162212st6.pdf [file sph006162212st6.pdf]

**Table S3. Histopathologic lesions in Rat PyV2 infected rats**

| Organ                                          | Lesion                                       | Severity by Group |           |                                    |
|------------------------------------------------|----------------------------------------------|-------------------|-----------|------------------------------------|
|                                                |                                              | Adults            | Weanlings | Co-infected with <i>P. carinii</i> |
| Lungs**                                        | Bronchiolar hyperplasia                      | Moderate          | Moderate  | Moderate                           |
|                                                | Interstitial pneumonia*                      | Moderate          | Severe    | Moderate                           |
|                                                | Alveolar edema                               | Mild              | Severe    | Mild                               |
|                                                | Alveolar hemorrhage                          | Moderate          | Mild      | Moderate                           |
|                                                | Alveolar neutrophils                         | —                 | Moderate  | —                                  |
|                                                | Subpleural foamy macrophages                 | Moderate          | —         | Moderate                           |
|                                                | Bronchial neutrophils and mucous             | Mild              | —         | Severe                             |
| Nasal cavity**                                 | Epithelial necrosis                          | Mild              | Severe    | N/A                                |
|                                                | Neutrophilic and histiocytic infiltrates     | Mild              | Severe    | N/A                                |
|                                                | Lymphoplasmacytic and mastocytic infiltrates | Moderate          | —         | N/A                                |
| Harderian gland**                              | Epithelial necrosis                          | Severe            | —         | N/A                                |
|                                                | Epithelial hyperplasia                       | Severe            | Mild      | N/A                                |
|                                                | Glandular atrophy and loss                   | Severe            | —         | N/A                                |
|                                                | Fibrosis                                     | Moderate          | —         | N/A                                |
|                                                | Mixed inflammatory infiltrate                | Moderate          | —         | N/A                                |
| Salivary glands ** (Parotid and Submandibular) | Epithelial necrosis                          | Severe            | Mild      | N/A                                |
|                                                | Glandular atrophy and loss                   | Severe            | Mild      | N/A                                |
|                                                | Fibrosis                                     | Severe            | Mild      | N/A                                |
|                                                | Mixed inflammatory infiltrate                | Moderate          | Mild      | N/A                                |
| Prostate**                                     | Hyperplasia and dysplasia                    | Severe            | N/A       | N/A                                |
| Uterus**                                       | Epithelial hyperplasia                       | Mild              | —         | N/A                                |
| Kidney                                         | Tubular necrosis                             | Moderate***       | —         | N/A                                |

\*Interstitial pneumonia was characterized by mixed interstitial inflammatory infiltrates and type II pneumocyte hyperplasia

\*\* Intranuclear inclusion bodies were present in epithelial cells of these organs in every group where tissue was examined

\*\*\*Lesion only present in a single male examined

N/A: Not applicable; organ not examined in this group

Dash (—): Lesion not present
